# Supplementary material
Source: publisher site journal article supplement (https://www.spandidos-publications.com/2159/downloadSupplementary)

Figure S1. Body weights of mice implanted with OSCC xenografts. (A) SAS cells ( $5 \times 10^6$  cells) were injected subcutaneously into the left flank, and  $100 \mu\text{g}$  of EpMab-16 or control mouse IgG in  $100 \mu\text{l}$  PBS was injected i.p. into treatment and control mice, respectively. Additional antibodies were then injected on days 8 and 14. Mouse weights were measured on days 0, 3, 7, 9, 10, 14, and 17. Values represent the mean  $\pm$  SEM. Statistical analysis was conducted using ANOVA and Sidak's multiple comparisons tests. (B) HSC-2 cells ( $5 \times 10^6$  cells) were injected subcutaneously into the left flank, and  $100 \mu\text{g}$  of EpMab-16 or control mouse IgG in  $100 \mu\text{l}$  PBS was injected i.p. into treatment and control mice, respectively. Additional antibodies were then injected on days 8 and 14. Mouse weights were measured on days 7, 10, 14, and 18. Values represent the mean  $\pm$  SEM. Statistical analysis was conducted using ANOVA and Sidak's multiple comparisons tests. OSCC, oral squamous cell carcinoma; PBS, phosphate-buffered saline; SEM, standard error of the mean; n.s. not significant.

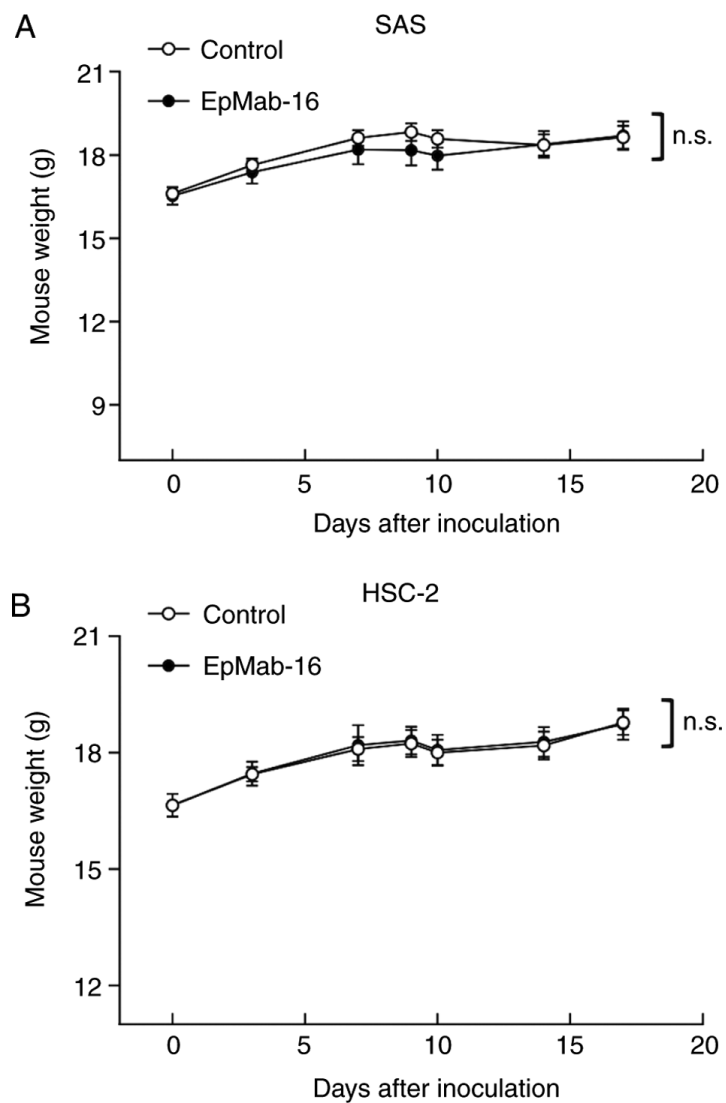

Supplement: Supplementary file 1 [file downloadSupplementary]
